# Supplementary material for: Mitochondrial and apicoplast genome copy abundances of haemosporidian parasites are explained by host species and parasitic lineage
Source: Frontiers journal article supplement (doi:10.3389/fevo.2024.1305418), 2024-02-07
Supplement: Table_1.XLSX [file Table_1.XLSX]

## Sheet: qPCR_comb
ID	Species	Genus	Family	Order	Lineage	GenusP	Plate	ctNucH	ctNucP	ctMito	ctApico	rqNucH	rqNucleusP	rqMito	rqApico
1	A. nisus	Accipiter	Accipitridae	Accipitriformes	ACNI03	Leucocytozoon	2	25.5061	38.2034	31.5235	32.2725	11.8806	0.00236	0.20904	0.12642
2	P. sibilatrix	Phylloscopus	Sylvioidea	Passeriformes	AEMO01	Plasmodium	3	22.6939	36.9505	28.2669	30.3701	78.4975	0.00547	1.86124	0.45344
3	A. monachus	Aegypius	Accipitridae	Accipitriformes	AEMO02	Leucocytozoon	2	23.0571	38.5985	36.3411	33.8108	61.5091	0.00181	0.00823	0.045
4	C. livia	Columba	Columbidae	Columbiformes	AEMO02	Leucocytozoon	1	23.1571	38.4952	26.6241	33.6057	57.5127	0.00194	5.60814	0.05165
5	S. turtur	Streptopelia	Columbidae	Columbiformes	AEMO02	Leucocytozoon	6	23.9461	36.1757	28.671	30.5107	33.8609	0.0092	1.41898	0.4126
6	A. chrysaetos	Aquila	Accipitridae	Accipitriformes	AQCH01	Leucocytozoon	2	26.2936	37.7026	33.2156	32.6617	7.00183	0.0033	0.06711	0.09735
7	B. buteo	Buteo	Accipitridae	Accipitriformes	AQCH01	Leucocytozoon	2	22.6395	39.8176	29.1543	32.0518	81.415	0.0008	1.02579	0.14661
8	B. buteo	Buteo	Accipitridae	Accipitriformes	AQCH02	Leucocytozoon	6	26.9248	38.294	26.9725	34.3017	4.58294	0.00222	4.43837	0.03237
9	B. bubo	Bubo	Strigidae	Strigiformes	ASOT01	Leucocytozoon	1	23.7724	38.5632	34.8992	34.1204	38.0502	0.00185	0.02167	0.03656
10	B. buteo	Buteo	Accipitridae	Accipitriformes	BUBT02	Leucocytozoon	2	22.2769	38.3585	24.6638	33.0706	103.855	0.00212	20.9134	0.07397
11	B. buteo	Buteo	Accipitridae	Accipitriformes	BUBT02	Leucocytozoon	2	23.9775	37.9671	30.801	33.1551	33.1565	0.00276	0.33953	0.06989
12	B. buteo	Buteo	Accipitridae	Accipitriformes	BUBT03	Leucocytozoon	2	23.1157	37.7912	31.9323	33.5251	59.1356	0.00311	0.15885	0.05452
13	M. milvus	Milvus	Accipitridae	Accipitriformes	BUBT03	Leucocytozoon	2	24.359	37.5007	25.6395	28.5721	25.6623	0.00378	10.8624	1.51639
14	B. buteo	Buteo	Accipitridae	Accipitriformes	BUBT03	Leucocytozoon	2	24.7043	37.1962	33.2886	34.6377	20.3526	0.00464	0.0639	0.02583
15	B. buteo	Buteo	Accipitridae	Accipitriformes	BUBT03	Leucocytozoon	2	22.3418	38.3896	31.3986	32.8937	99.43	0.00208	0.22731	0.0833
16	B. buteo	Buteo	Accipitridae	Accipitriformes	BUBT03	Leucocytozoon	2	25.083	37.3162	27.8706	31.7336	15.783	0.00428	2.42865	0.18153
17	B. buteo	Buteo	Accipitridae	Accipitriformes	BUBT03	Leucocytozoon	1	23.1902	40.0977	33.7225	33.2454	56.25	0.00066	0.04775	0.06578
18	B. buteo	Buteo	Accipitridae	Accipitriformes	BUBT03	Leucocytozoon	1	23.1009	37.059	36.2247	33.2525	59.7266	0.00508	0.0089	0.06547
19	B. buteo	Buteo	Accipitridae	Accipitriformes	BUBT03	Leucocytozoon	1	23.3241	37.8475	31.7486	31.8244	51.4129	0.00299	0.1797	0.1708
20	B. buteo	Buteo	Accipitridae	Accipitriformes	BUBT03	Leucocytozoon	1	23.4562	37.8693	28.5899	32.0197	47.0515	0.00295	1.49839	0.1498
21	B. buteo	Buteo	Accipitridae	Accipitriformes	BUBT03	Leucocytozoon	1	23.3351	39.0487	30.9326	33.5645	51.0364	0.00134	0.31081	0.0531
22	B. buteo	Buteo	Accipitridae	Accipitriformes	BUBT03	Leucocytozoon	1	23.1081	37.143	32.2927	32.6195	59.4374	0.0048	0.12471	0.10014
23	B. buteo	Buteo	Accipitridae	Accipitriformes	BUBT03	Leucocytozoon	1	24.12	39.4429	32.544	33.3608	30.1297	0.00103	0.10535	0.06088
24	B. buteo	Buteo	Accipitridae	Accipitriformes	BUBT03	Leucocytozoon	1	23.2271	37.3417	29.3719	31.3796	54.8738	0.0042	0.88631	0.23023
25	B. buteo	Buteo	Accipitridae	Accipitriformes	BUBT03	Leucocytozoon	1	22.6937	37.0184	27.8636	30.3397	78.5039	0.00522	2.44014	0.46281
26	B. buteo	Buteo	Accipitridae	Accipitriformes	BUBT03	Leucocytozoon	2	24.606	38.7372	36.4339	33.7812	21.7417	0.00165	0.00773	0.04591
27	B. buteo	Buteo	Accipitridae	Accipitriformes	BUBT03	Leucocytozoon	6	23.6802	36.6251	33.7535	33.6062	40.4812	0.0068	0.04677	0.05163
28	B. rufinus	Buteo	Accipitridae	Accipitriformes	BUBT03	Leucocytozoon	1	23.3377	30.2845	23.0211	28.2295	50.9477	0.48026	63.0137	1.90862
29	B. buteo	Buteo	Accipitridae	Accipitriformes	BUBT04	Leucocytozoon	2	21.4217	38.8419	30.1858	32.3356	184.414	0.00154	0.51318	0.12117
30	B. buteo	Buteo	Accipitridae	Accipitriformes	BUBT04	Leucocytozoon	1	23.1106	38.1315	29.984	31.6228	59.3383	0.00247	0.58764	0.19555
31	B. buteo	Buteo	Accipitridae	Accipitriformes	BUBT04	Leucocytozoon	1	22.8587	37.8912	33.8931	33.3228	70.274	0.00291	0.04259	0.06245
32	B. buteo	Buteo	Accipitridae	Accipitriformes	BUBT04	Leucocytozoon	2	24.4359	38.0901	34.8516	33.0009	24.3711	0.00254	0.02237	0.07752
33	B. buteo	Buteo	Accipitridae	Accipitriformes	BUBT04	Leucocytozoon	6	27.2197	37.9453	33.3033	33.6216	3.75984	0.0028	0.06327	0.0511
34	B. buteo	Buteo	Accipitridae	Accipitriformes	BUBT04	Leucocytozoon	6	23.2619	38.1367	30.9271	32.1593	53.6067	0.00247	0.31197	0.1364
35	M. milvus	Milvus	Accipitridae	Accipitriformes	Butruf0	Leucocytozoon	5	24.1101	37.5949	28.8655	35.1871	30.3319	0.00355	1.24525	0.01786
36	C. corax	Corvus	Corvidae	Passeriformes	CCORAX07	Leucocytozoon	1	24.6206	38.447	36.077	34.2682	21.5291	0.002	0.00983	0.0331
37	C. corax	Corvus	Corvidae	Passeriformes	CCORAX07	Leucocytozoon	1	23.8667	38.6472	35.4901	33.2791	35.717	0.00175	0.01457	0.06431
38	A. monachus	Aegypius	Accipitridae	Accipitriformes	CIAE02	Leucocytozoon	2	23.0881	37.126	31.3562	32.58	60.2392	0.00486	0.23388	0.10283
39	A. monachus	Aegypius	Accipitridae	Accipitriformes	CIAE02	Leucocytozoon	2	24.093	38.5825	31.6284	33.3537	30.6817	0.00183	0.19481	0.06117
40	H. pennatus	Hieraaetus	Accipitridae	Accipitriformes	CIAE02	Leucocytozoon	2	23.3058	36.4645	31.8108	32.3922	52.0494	0.00758	0.17236	0.11665
41	H. pennatus	Hieraaetus	Accipitridae	Accipitriformes	CIAE02	Leucocytozoon	2	23.2788	39.4831	29.6085	32.7757	53.0008	0.001	0.75612	0.09017
42	H. pennatus	Hieraaetus	Accipitridae	Accipitriformes	CIAE02	Leucocytozoon	2	23.7474	39.9495	33.1499	33.8013	38.6951	0.00073	0.07014	0.04529
43	H. pennatus	Hieraaetus	Accipitridae	Accipitriformes	CIAE02	Leucocytozoon	2	24.4497	37.3532	33.444	32.4751	24.1466	0.00417	0.05757	0.11034
44	H. pennatus	Hieraaetus	Accipitridae	Accipitriformes	CIAE02	Leucocytozoon	2	23.3897	38.2199	34.7201	34.2778	49.1979	0.00233	0.02444	0.03289
45	H. pennatus	Hieraaetus	Accipitridae	Accipitriformes	CIAE02	Leucocytozoon	2	24.3373	37.3329	34.1096	33.1751	26.0406	0.00423	0.03682	0.06896
46	N. percnopterus	Neophron	Accipitridae	Accipitriformes	CIAE02	Leucocytozoon	2	23.5803	35.6106	33.4036	32.6963	43.2876	0.01344	0.05915	0.09511
47	C. frugilegus	Corvus	Corvidae	Passeriformes	COCOR13	Leucocytozoon	1	23.0743	38.0421	34.744	33.9037	60.8034	0.00263	0.02405	0.04228
48	C. frugilegus	Corvus	Corvidae	Passeriformes	COCOR13	Leucocytozoon	1	23.4082	39.4846	29.4152	34.0457	48.5895	0.001	0.86095	0.03844
49	C. livia	Columba	Columbidae	Columbiformes	COLIV03	Haemoproteus	1	23.1067	37.7081	31.402	31.8768	59.4925	0.00329	0.22679	0.16489
50	C. livia	Columba	Columbidae	Columbiformes	COLIV03	Haemoproteus	1	23.2791	38.2266	29.8628	31.234	52.9922	0.00232	0.63745	0.25388
51	C. livia	Columba	Columbidae	Columbiformes	COQUI05	Haemoproteus	1	23.2882	38.1473	31.0324	32.9553	52.6666	0.00245	0.29067	0.07993
52	S. communis	Sylvia	Sylviidae	Passeriformes	CWT2	Haemoproteus	3	23.3052	37.1029	34.9545	32.9091	52.0695	0.00493	0.02088	0.08245
53	S. communis	Sylvia	Sylviidae	Passeriformes	CWT2	Haemoproteus	3	22.3204	38.1181	29.1328	28.4439	100.87	0.0025	1.04068	1.6527
54	S. communis	Sylvia	Sylviidae	Passeriformes	CWT2	Haemoproteus	3	22.7022	37.6962	32.0788	31.2206	78.0602	0.00331	0.14397	0.25617
55	S. communis	Sylvia	Sylviidae	Passeriformes	CWT2	Haemoproteus	3	23.4238	37.7584	32.4719	31.2594	48.0835	0.00318	0.11058	0.24959
56	B. buteo	Buteo	Accipitridae	Accipitriformes	GRW06	Plasmodium	2	21.7869	37.3013	33.0587	33.0423	144.315	0.00432	0.07457	0.0754
57	I. pallida	Iduna	Sylvioidea	Passeriformes	HIP2	Haemoproteus	3	22.8873	36.8647	26.1033	28.4875	68.9375	0.00579	7.95606	1.60498
58	B. buteo	Buteo	Accipitridae	Accipitriformes	MILANS04	Leucocytozoon	4	24.9611	29.2263	20.6529	23.7932	17.1294	0.97732	309.024	37.5219
59	B. buteo	Buteo	Accipitridae	Accipitriformes	MILANS04	Leucocytozoon	4	24.0383	34.3747	25.9302	30.5245	31.8303	0.03082	8.9363	0.40879
60	M. milvus	Milvus	Accipitridae	Accipitriformes	MILANS04	Leucocytozoon	5	24.7961	39.643	26.9806	30.4156	19.136	0.0009	4.41436	0.4398
61	M. milvus	Milvus	Accipitridae	Accipitriformes	MILANS04	Leucocytozoon	5	24.6776	37.7025	26.591	29.5596	20.7216	0.0033	5.73424	0.78136
62	M. milvus	Milvus	Accipitridae	Accipitriformes	MILANS04	Leucocytozoon	5	24.4732	32.4556	21.7314	25.0909	23.7686	0.11179	149.792	15.6996
63	A. gentilis	Accipiter	Accipitridae	Accipitriformes	MILANS04	Leucocytozoon	5	23.9849	38.1247	27.2829	28.9778	32.991	0.00249	3.60348	1.1548
64	A. gentilis	Accipiter	Accipitridae	Accipitriformes	MILANS04	Leucocytozoon	6	22.9859	37.4035	24.4056	25.7689	64.5183	0.00403	24.8733	9.95833
65	M. milvus	Milvus	Accipitridae	Accipitriformes	MILANS04	Leucocytozoon	5	24.4837	38.101	28.7777	31.1621	23.6025	0.00252	1.32085	0.26643
66	M. milvus	Milvus	Accipitridae	Accipitriformes	MILANS04	Leucocytozoon	5	24.25	39.6409	28.6953	31.2276	27.6123	0.0009	1.39602	0.25496
67	M. milvus	Milvus	Accipitridae	Accipitriformes	MILANS04	Leucocytozoon	5	24.0936	37.2158	28.5172	30.7314	30.6689	0.00457	1.57332	0.35576
68	M. milvus	Milvus	Accipitridae	Accipitriformes	MILANS04	Leucocytozoon	5	23.6846	36.9784	26.7189	30.7163	40.3616	0.00537	5.26254	0.35939
69	M. milvus	Milvus	Accipitridae	Accipitriformes	MILANS04	Leucocytozoon	5	24.0695	34.0784	23.7276	25.945	31.1689	0.0376	39.2114	8.84807
70	M. milvus	Milvus	Accipitridae	Accipitriformes	MILANS04	Leucocytozoon	5	25.3467	32.2589	21.6039	24.7884	13.222	0.12758	163.178	19.235
71	A. gentilis	Accipiter	Accipitridae	Accipitriformes	MILANS04	Leucocytozoon	5	25.0855	38.2157	25.9766	28.2036	15.7564	0.00234	8.66218	1.94204
72	B. buteo	Buteo	Accipitridae	Accipitriformes	MILANS04	Leucocytozoon	5	24.1145	35.0397	26.5553	29.6544	30.2423	0.01972	5.8733	0.73318
73	A. gentilis	Accipiter	Accipitridae	Accipitriformes	MILANS04	Leucocytozoon	5	25.9633	35.9293	23.6734	26.0843	8.74026	0.01085	40.6656	8.05794
74	B. buteo	Buteo	Accipitridae	Accipitriformes	MILANS04	Leucocytozoon	4	24.3857	31.8068	22.3715	25.125	25.2066	0.17282	97.4644	15.3443
75	B. buteo	Buteo	Accipitridae	Accipitriformes	MILANS04	Leucocytozoon	4	24.6693	31.5129	21.9942	25.0815	20.8368	0.21052	125.564	15.7988
76	B. buteo	Buteo	Accipitridae	Accipitriformes	MILANS04	Leucocytozoon	4	24.4508	33.2467	22.7382	26.0276	24.1291	0.06573	76.1937	8.37072
77	B. buteo	Buteo	Accipitridae	Accipitriformes	MILANS04	Leucocytozoon	4	24.1588	35.898	27.4503	31.8199	29.356	0.01108	3.22049	0.1713
78	B. buteo	Buteo	Accipitridae	Accipitriformes	MILANS04	Leucocytozoon	4	24.0235	28.6449	19.3909	22.5359	32.1466	1.44403	721.038	87.2809
79	B. buteo	Buteo	Accipitridae	Accipitriformes	MILANS04	Leucocytozoon	4	23.7194	29.0451	20.8873	23.4746	39.4292	1.10379	264.013	46.4734
80	B. buteo	Buteo	Accipitridae	Accipitriformes	MILANS04	Leucocytozoon	4	24.2167	27.3175	19.3365	21.4863	28.2368	3.52069	747.888	176.594
81	B. buteo	Buteo	Accipitridae	Accipitriformes	MILANS04	Leucocytozoon	4	23.5975	36.1022	24.179	27.1865	42.7927	0.00966	28.9592	3.84438
82	B. buteo	Buteo	Accipitridae	Accipitriformes	MILANS04	Leucocytozoon	4	24.0243	33.0106	23.432	26.4212	32.1296	0.07701	47.8211	6.42694
83	B. buteo	Buteo	Accipitridae	Accipitriformes	MILANS04	Leucocytozoon	5	23.4899	36.0775	24.6729	28.7949	45.9978	0.00982	20.7869	1.30568
84	B. buteo	Buteo	Accipitridae	Accipitriformes	MILANS04	Leucocytozoon	5	24.0579	29.3979	19.5226	22.6877	31.4126	0.871	660.021	78.824
85	B. buteo	Buteo	Accipitridae	Accipitriformes	MILANS04	Leucocytozoon	4	23.4945	27.871	18.8432	22.2773	45.8573	2.42791	1041.55	103.83
86	B. buteo	Buteo	Accipitridae	Accipitriformes	MILANS04	Leucocytozoon	5	23.6175	34.6936	21.8337	25.5079	42.2198	0.02488	139.854	11.8661
87	B. buteo	Buteo	Accipitridae	Accipitriformes	MILANS04	Leucocytozoon	4	23.1514	33.7071	23.6179	26.9637	57.7365	0.04825	42.2096	4.46495
88	B. buteo	Buteo	Accipitridae	Accipitriformes	MILANS04	Leucocytozoon	4	24.1114	34.5223	24.3427	28.0433	30.3058	0.02791	25.9453	2.16268
89	B. buteo	Buteo	Accipitridae	Accipitriformes	MILANS04	Leucocytozoon	5	23.9817	30.2844	20.0347	23.2161	33.0622	0.48031	467.984	55.2801
90	B. buteo	Buteo	Accipitridae	Accipitriformes	MILANS04	Leucocytozoon	4	25.2489	32.0932	21.0149	24.9893	14.1198	0.14259	242.331	16.8085
91	B. buteo	Buteo	Accipitridae	Accipitriformes	MILANS04	Leucocytozoon	4	23.6443	30.5536	22.1207	24.8143	41.4675	0.40089	115.344	18.9039
92	B. buteo	Buteo	Accipitridae	Accipitriformes	MILANS04	Leucocytozoon	4	23.3955	34.0532	21.8308	24.9681	49.0077	0.03824	140.121	17.0498
93	B. buteo	Buteo	Accipitridae	Accipitriformes	MILANS04	Leucocytozoon	4	23.2429	28.6458	19.8328	23.0806	54.2933	1.44315	535.934	60.5434
94	B. buteo	Buteo	Accipitridae	Accipitriformes	MILANS04	Leucocytozoon	4	24.2211	28.5446	20.4515	23.9446	28.1525	1.54467	353.752	33.8952
95	B. buteo	Buteo	Accipitridae	Accipitriformes	MILANS04	Leucocytozoon	4	23.1321	34.6824	24.9387	28.1216	58.4868	0.02507	17.3891	2.05194
96	B. buteo	Buteo	Accipitridae	Accipitriformes	MILANS04	Leucocytozoon	5	24.2137	32.3045	27.0901	32.1427	28.2937	0.12373	4.10158	0.13792
97	B. buteo	Buteo	Accipitridae	Accipitriformes	MILANS04	Leucocytozoon	5	24.545	30.4225	22.5282	24.9884	22.6507	0.43776	87.7329	16.8185
98	B. buteo	Buteo	Accipitridae	Accipitriformes	MILANS04	Leucocytozoon	4	24.0426	28.7385	20.0765	22.6373	31.7378	1.35605	455.043	81.5364
99	B. buteo	Buteo	Accipitridae	Accipitriformes	MILANS04	Leucocytozoon	4	23.6422	29.4455	20.131	22.3782	41.5255	0.84361	438.702	97.0311
100	B. buteo	Buteo	Accipitridae	Accipitriformes	MILANS04	Leucocytozoon	5	24.6758	29.5557	20.3788	23.284	20.7458	0.78341	371.458	52.8156
101	B. buteo	Buteo	Accipitridae	Accipitriformes	MILANS04	Leucocytozoon	4	24.5321	35.8109	31.4629	34.6255	22.8476	0.01175	0.21771	0.02604
102	B. buteo	Buteo	Accipitridae	Accipitriformes	MILANS04	Leucocytozoon	4	24.1916	37.8003	31.1993	36.0303	28.7165	0.00309	0.25986	0.01014
103	M. milvus	Milvus	Accipitridae	Accipitriformes	MILANS04	Leucocytozoon	4	23.8577	33.0415	22.726	25.9154	35.9327	0.07543	76.8214	9.02598
104	B. buteo	Buteo	Accipitridae	Accipitriformes	MILANS04	Leucocytozoon	1	23.5291	38.2623	36.4732	33.5154	44.8022	0.00227	0.00753	0.05488
105	M. milvus	Milvus	Accipitridae	Accipitriformes	MILANS04	Leucocytozoon	6	25.0897	30.8698	28.9528	31.1918	15.7124	0.3242	1.17436	0.26117
106	B. buteo	Buteo	Accipitridae	Accipitriformes	MILANS04	Leucocytozoon	2	21.8367	36.7929	29.747	32.1357	139.569	0.00608	0.68898	0.13858
107	B. buteo	Buteo	Accipitridae	Accipitriformes	MILANS04	Leucocytozoon	6	23.0994	33.7341	26.4629	28.6984	59.787	0.04738	6.24921	1.39314
108	M. milvus	Milvus	Accipitridae	Accipitriformes	MILANS04	Leucocytozoon	6	26.2136	34.9629	32.6169	33.467	7.38813	0.02076	0.10032	0.05669
109	B. buteo	Buteo	Accipitridae	Accipitriformes	MILANS04	Leucocytozoon	6	25.5317	38.6769	30.4217	31.108	11.6775	0.00172	0.43801	0.27629
110	A. gentilis	Accipiter	Accipitridae	Accipitriformes	MILANS04	Leucocytozoon	5	25.4716	37.1839	28.7166	32.057	12.1586	0.00467	1.3762	0.1461
111	M. milvus	Milvus	Accipitridae	Accipitriformes	MILVUS01	Leucocytozoon	5	24.1391	38.0552	28.1417	35.7622	29.7454	0.0026	2.02441	0.01214
112	M. milvus	Milvus	Accipitridae	Accipitriformes	MILVUS01	Leucocytozoon	4	23.9131	39.2856	24.9566	35.6943	34.6203	0.00114	17.1811	0.01271
113	B. buteo	Buteo	Accipitridae	Accipitriformes	MILVUS01	Leucocytozoon	5	21.8424	37.172	22.3306	34.9394	139.04	0.00471	100.178	0.02109
114	B. buteo	Buteo	Accipitridae	Accipitriformes	MILVUS01	Leucocytozoon	6	22.9115	36.2826	23.7028	34.0981	67.8256	0.00856	39.8713	0.03711
115	B. buteo	Buteo	Accipitridae	Accipitriformes	MILVUS01	Leucocytozoon	6	22.5635	30.082	22.4964	24.6865	85.676	0.55021	89.624	20.5972
116	B. buteo	Buteo	Accipitridae	Accipitriformes	MILVUS01	Leucocytozoon	5	26.1184	36.2811	28.8784	34.9627	7.87559	0.00857	1.23449	0.02077
117	B. buteo	Buteo	Accipitridae	Accipitriformes	MILVUS01	Leucocytozoon	6	23.2639	32.9963	28.5964	32.2184	53.5341	0.07776	1.49185	0.1311
118	B. buteo	Buteo	Accipitridae	Accipitriformes	MILVUS01	Leucocytozoon	5	25.4278	39.4299	29.716	35.6099	12.5219	0.00103	0.7035	0.01345
119	B. buteo	Buteo	Accipitridae	Accipitriformes	MILVUS01	Leucocytozoon	6	24.7427	36.813	28.157	33.9883	19.8354	0.006	2.00375	0.03995
120	B. buteo	Buteo	Accipitridae	Accipitriformes	MILVUS01	Leucocytozoon	6	23.1962	38.3848	30.355	33.7939	56.0227	0.00209	0.45806	0.04552
121	M. migrans	Milvus	Accipitridae	Accipitriformes	MILVUS01	Leucocytozoon	6	29.6917	38.3264	38.5523	34.3301	0.71506	0.00217	0.00186	0.03176
122	B. buteo	Buteo	Accipitridae	Accipitriformes	MILVUS01	Leucocytozoon	6	24.0955	35.6807	25.9777	32.9044	30.6294	0.01282	8.65606	0.08271
123	M. milvus	Milvus	Accipitridae	Accipitriformes	MILVUS01	Leucocytozoon	6	24.1583	38.2744	25.9761	34.0497	29.3644	0.00225	8.66528	0.03833
124	B. buteo	Buteo	Accipitridae	Accipitriformes	MILVUS01	Leucocytozoon	6	23.0389	34.4494	26.3078	31.119	62.2669	0.02931	6.93524	0.27426
125	B. buteo	Buteo	Accipitridae	Accipitriformes	MILVUS01	Leucocytozoon	6	23.2005	36.9294	29.6648	33.2053	55.862	0.00554	0.7281	0.06758
126	B. buteo	Buteo	Accipitridae	Accipitriformes	MILVUS01	Leucocytozoon	6	23.3776	36.2529	36.12	34.0174	49.5987	0.00873	0.00955	0.03918
127	M. milvus	Milvus	Accipitridae	Accipitriformes	MILVUS01	Leucocytozoon	6	26.5686	38.5498	32.5058	33.8569	5.82113	0.00187	0.10809	0.04363
128	B. bubo	Bubo	Strigidae	Strigiformes	OTUSCO09	Leucocytozoon	1	23.6083	38.4676	38.1221	33.524	42.482	0.00197	0.00249	0.05456
129	B. bubo	Bubo	Strigidae	Strigiformes	OTUSCO09	Leucocytozoon	1	24.2259	37.9096	38.275	34.0817	28.0622	0.00287	0.00225	0.03752
130	C. frugilegus	Corvus	Corvidae	Passeriformes	PARUS20	Leucocytozoon	1	23.2226	38.2213	31.7251	33.2475	55.0408	0.00233	0.18256	0.06569
131	C. frugilegus	Corvus	Corvidae	Passeriformes	PARUS20	Leucocytozoon	1	23.8909	38.8359	33.4317	33.6462	35.1414	0.00154	0.05805	0.05026
132	P. sibilatrix	Phylloscopus	Sylvioidea	Passeriformes	PHSIB2	Haemoproteus	3	20.9422	38.1011	25.0928	27.3936	254.465	0.00252	15.6799	3.34542
133	P. sibilatrix	Phylloscopus	Sylvioidea	Passeriformes	PHSIB2	Haemoproteus	3	20.9862	36.9169	23.9658	27.2266	247.055	0.00559	33.4164	3.74229
134	L. luscinia	Luscinia	Muscicapidae	Passeriformes	ROBIN1/LULU1	Haemoproteus	3	21.731	37.4051	26.4957	28.1473	149.83	0.00403	6.1134	2.01691
135	L. luscinia	Luscinia	Muscicapidae	Passeriformes	ROBIN1/LULU1	Haemoproteus	3	22.8828	37.8675	25.9193	28.0471	69.1459	0.00295	9.00223	2.15726
136	L. luscinia	Luscinia	Muscicapidae	Passeriformes	ROBIN1/LULU1	Haemoproteus	3	22.3485	37.5925	27.1374	29.175	98.9805	0.00355	3.97339	1.01158
137	S. atricapilla	Sylvia	Sylviidae	Passeriformes	ROBIN1/LULU1	Haemoproteus	3	22.6813	39.028	27.8388	29.3256	79.1625	0.00136	2.481	0.91431
138	I. pallida	Iduna	Sylvioidea	Passeriformes	RW2	Haemoproteus	3	21.8322	36.6871	25.7783	28.8876	139.993	0.00652	9.89564	1.22694
139	S. communis	Sylvia	Sylviidae	Passeriformes	SGS1	Plasmodium	3	22.2734	40.1123	33.4686	32.8705	104.1	0.00065	0.05663	0.08461
140	L. megarhynchos	Luscinia	Muscicapidae	Passeriformes	SGS1	Plasmodium	3	22.5717	37.5042	29.6821	31.3165	85.2045	0.00377	0.71969	0.24019
141	S. borin	Sylvia	Sylviidae	Passeriformes	SGS1	Plasmodium	3	23.0609	36.2632	32.4325	32.6058	61.3515	0.00867	0.11354	0.10107
142	S. borin	Sylvia	Sylviidae	Passeriformes	SGS1	Plasmodium	3	23.9883	38.8232	34.0833	32.3738	32.9149	0.00155	0.03748	0.1181
143	L. megarhynchos	Luscinia	Muscicapidae	Passeriformes	SGS1	Plasmodium	3	22.7173	38.0832	29.7602	32.49	77.2689	0.00256	0.68292	0.10924
144	S. communis	Sylvia	Sylviidae	Passeriformes	SGS1	Plasmodium	3	22.6937	38.2672	32.847	32.258	78.5038	0.00226	0.08596	0.12765
145	B. scandiacus	Bubo	Strigidae	Strigiformes	SGS1	Plasmodium	2	22.1405	37.546	23.0115	27.2354	113.819	0.00367	63.4218	3.72031
146	S. turtur	Streptopelia	Columbidae	Columbiformes	SPISEN02	Haemoproteus	3	23.39	36.7968	26.6919	28.3219	49.1877	0.00606	5.35879	1.79376
147	S. turtur	Streptopelia	Columbidae	Columbiformes	STRTUR01	Haemoproteus	3	22.9675	36.2281	22.7444	23.6701	65.3238	0.00888	75.8792	40.757
148	S. turtur	Streptopelia	Columbidae	Columbiformes	STRTUR02	Haemoproteus	3	23.2984	38.1593	27.5782	30.3267	52.3068	0.00243	2.95552	0.46687
149	S. turtur	Streptopelia	Columbidae	Columbiformes	STRTUR03	Haemoproteus	3	23.2876	37.9271	29.7086	32.1167	52.6897	0.00284	0.70697	0.14035
150	S. turtur	Streptopelia	Columbidae	Columbiformes	STRTUR03	Haemoproteus	6	25.112	37.9209	30.173	32.2345	15.4792	0.00285	0.51762	0.12968
151	S. turtur	Streptopelia	Columbidae	Columbiformes	STRTUR04	Haemoproteus	3	23.2997	36.8944	33.972	33.3974	52.2645	0.00568	0.04039	0.0594
152	S. turtur	Streptopelia	Columbidae	Columbiformes	STRTUR05	Haemoproteus	3	25.0984	38.5526	25.5171	29.1214	15.6207	0.00186	11.7926	1.04864
153	S. atricapilla	Sylvia	Sylviidae	Passeriformes	SYAT01	Haemoproteus	3	22.617	37.1136	33.6651	30.0271	82.655	0.0049	0.04963	0.57088
